# Supplementary material for: Neutrophil mediated postoperative photoimmunotherapy against melanoma skin cancer
Source: Royal Society of Chemistry journal article supplement (doi:10.1039/d1nr04002b), 2021-01-01
Supplement: d1nr04002b1.pdf [file d1nr04002b1.pdf]

## Supporting information

### Neutrophil mediated postoperative photoimmunotherapy against melanoma skin cancer

Yunyun Wu<sup>a</sup>, Xiaoqing Han<sup>b</sup>, Runxiao Zheng<sup>b</sup>, Hongda Cheng<sup>c</sup>, Jiao Yan<sup>b</sup>, Xiaoqing Wu<sup>b</sup>, Yaqing Hu<sup>a</sup>, Bing Li<sup>a</sup>, Zhenxin Wang<sup>c,d</sup>, Xi Li<sup>a\*</sup> and Haiyuan Zhang<sup>b,d\*</sup>

<sup>a</sup> School of Chemistry and Life Science, Changchun University of Technology, Changchun 130012, P.R. China

<sup>b</sup> Laboratory of Chemical Biology, Changchun Institute of Applied Chemistry, Chinese Academy of Sciences, Changchun 130022 (China);

<sup>c</sup> State Key Laboratory of Electroanalytical Chemistry, Changchun Institute of Applied Chemistry, Chinese Academy of Science, Changchun, 130022, China.

<sup>d</sup> University of Science and Technology of China, Hefei, Anhui 230026 (China).

#### \*Corresponding author:

**Haiyuan Zhang** - Laboratory of Chemical Biology, Changchun Institute of Applied Chemistry, Chinese Academy of Sciences, Changchun 130022 (China); University of Science and Technology of China, Hefei, Anhui 230026 (China); E-mail: [zhangh@ciac.ac.cn](mailto:zhangh@ciac.ac.cn);

**Xi Li** - School of Chemistry and Life Science, Changchun University of Technology, Jilin, Changchun 130012 (China); E-mail: [xli@ccut.edu.cn](mailto:xli@ccut.edu.cn);

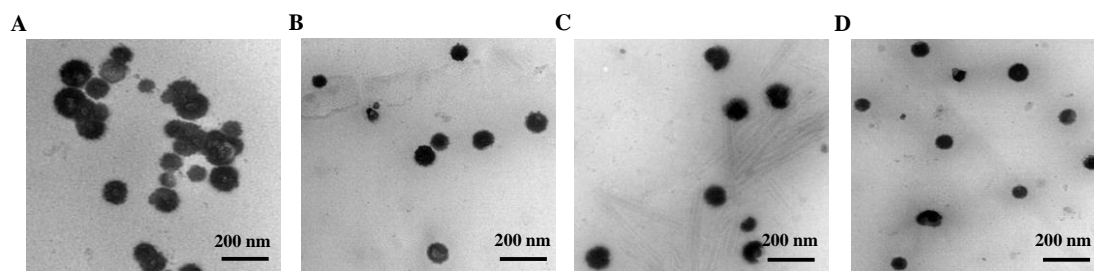

**Fig. S1** TEM images of  $\tau$ LipI (A),  $\tau$ LipT (B),  $\tau$ Lip (C) and Lip (D) NPs, respectively.

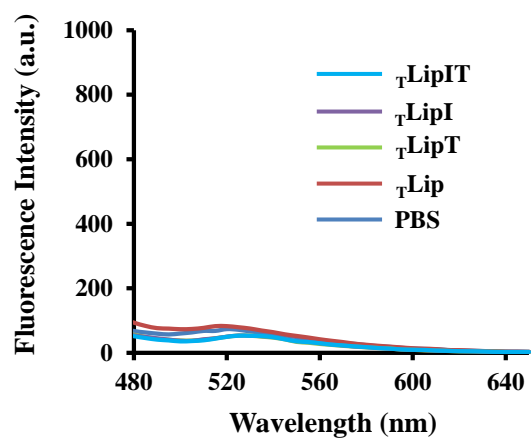

**Fig. S2**  $^1\text{O}_2$  generation behaviors of PBS,  $\tau$ Lip,  $\tau$ LipT,  $\tau$ LipI and  $\tau$ LipIT NPs without NIR laser irradiation based on SOSG assay.

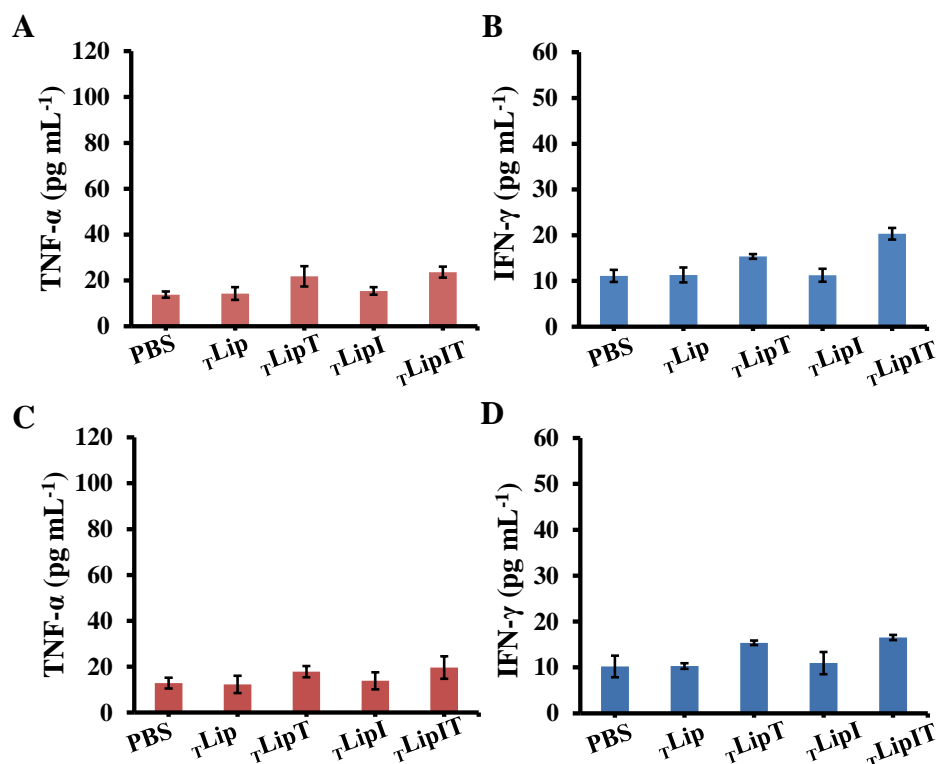

**Fig. S3** TNF- $\alpha$  (A) and IFN- $\gamma$  (B) levels in the lower chamber of DC/B16F10 transwell system; TNF- $\alpha$  (C) and IFN- $\gamma$  (D) levels in the lower chamber of DC transwell system. The lower chamber was treated with  $100 \mu\text{g mL}^{-1}$   $\tau$ Lip,  $\tau$ LipI,  $\tau$ LipT and  $\tau$ LipIT NPs (equivalent to liposome content) for 24 h without NIR laser irradiation, and the supernatants were analyzed by Elisa.

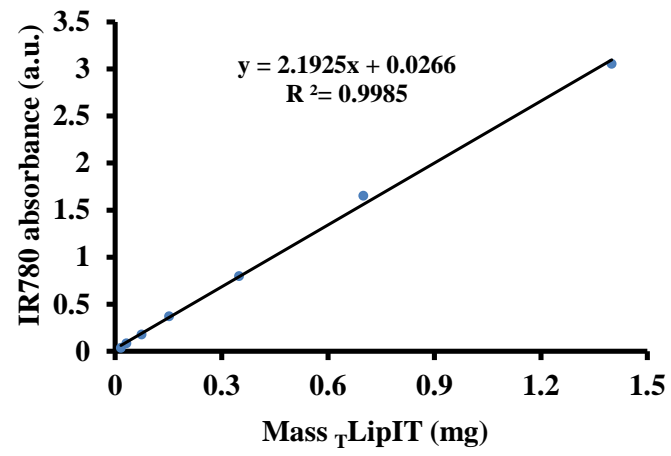

**Fig. S4** Standard curve of  $\tau$ LipIT according to IR780 absorbance.

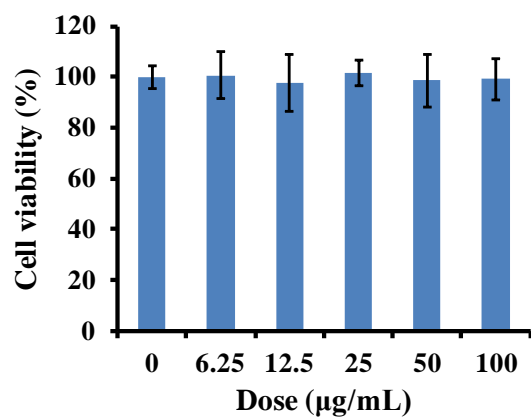

**Fig. S5** Viability assessment of NEs after 6 h of incubation with various concentrations of  $\tau$ LipIT based on MTT assay.

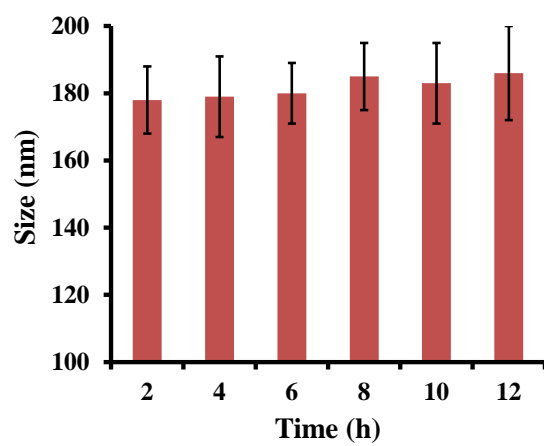

**Fig. S6** Hydrodynamic size variation of  $\tau$ LipIT NPs suspended in DMEM culture medium containing 10% FBS within 12 h.

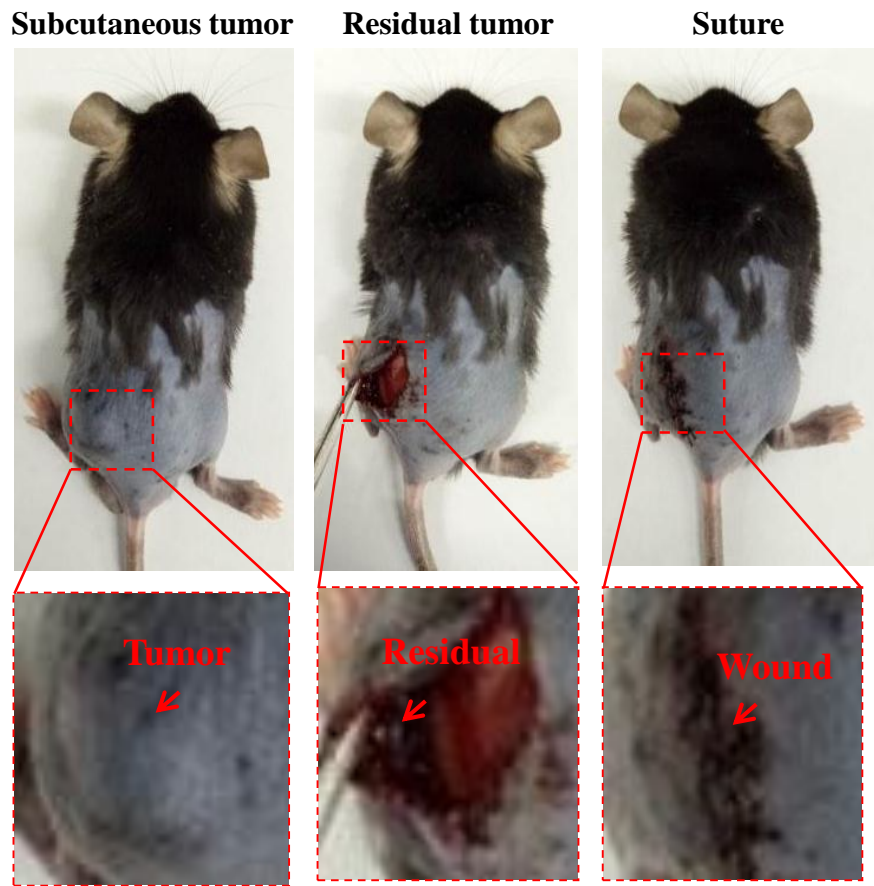

**Fig. S7** Surgical procedure images of tumor model.



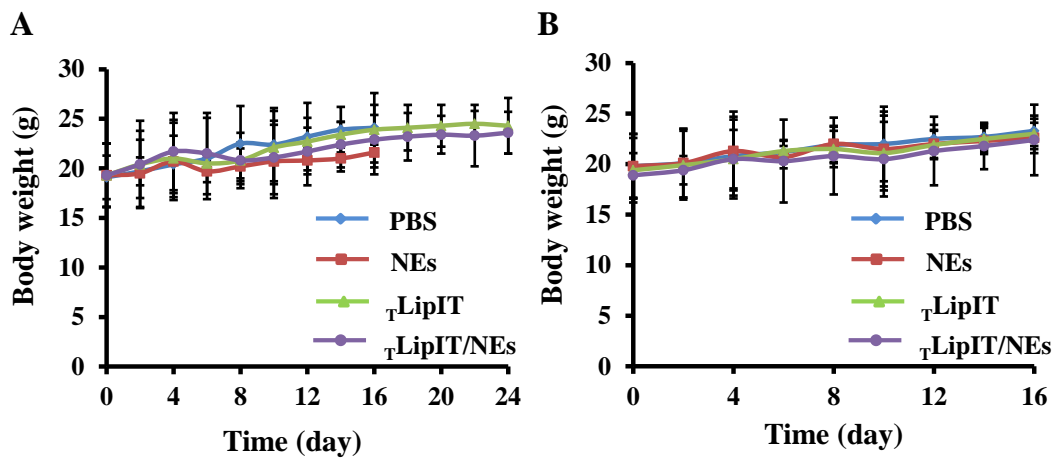

**Fig. S8** Mice body weight with (A) or without (B) NIR laser irradiation ( $0.75 \text{ W cm}^{-2}$ , 5 min).
